# Supplementary material
Source: PubMed Central journal article supplement (PMC2842188)
Supplement: NIHMS125424-supplement-1_si_001.pdf [file NIHMS125424-supplement-1_si_001.pdf]

Carborane-Based Pincers: Synthesis and Structure of SeBSe and SBS Pd(II)  
Complexes

Alexander M. Spokoyny, Matthew G. Reuter, Charlotte L. Stern, Mark A. Ratner, Tamar Seideman  
and Chad A. Mirkin\*

Department of Chemistry and International Institute for Nanotechnology, Northwestern University,  
2145 Sheridan Road, Evanston, Illinois 60208

\*To whom correspondence should be addressed:

E-mail [chadnano@northwestern.edu](mailto:chadnano@northwestern.edu)

Table of Contents:

|                                                                                    |          |
|------------------------------------------------------------------------------------|----------|
| 1. Synthetic and characterization methods and procedures.....                      | S2 - S4. |
| 2. Crystallographic structure determination details of <b>5</b> and <b>7</b> ..... | S5.      |
| 3. Computational details for <b>5</b> .....                                        | S5-S8.   |
| 4. NMR spectra of <b>4-7</b> .....                                                 | S9-S20.  |
| 5. References.....                                                                 | S21.     |

## 1. Synthetic and characterization methods and procedures.

All reactions were carried out under an inert atmosphere of nitrogen using standard Schlenk techniques and dry solvents; work-up and all post-reaction manipulations were done at ambient conditions, unless specifically noted otherwise. Solvents were purified by standard procedures. Deuterated solvents were purchased from Cambridge Isotope Laboratories and used as received. All reagents were used as received from Aldrich Chemical Company. **2** and **3** were prepared according to previously published literature procedures.<sup>\*S1-2</sup> All NMR spectra were recorded Bruker Advance 400MHz. <sup>1</sup>H and <sup>13</sup>C NMR were referenced to residual proton resonances in deuterated solvents. <sup>11</sup>B and <sup>77</sup>Se NMR were referenced to BF<sub>3</sub>-etherate and Me<sub>2</sub>Se standards respectively. Electrospray ionization (ESI) mass spectra were recorded on an Agilent ESI-MS MSD1100 mass spectrometer. Elemental analyses (C, H, Cl) were performed by Quantitative Technologies (Intertek), Whitehouse, NJ.

\*NMR data for compound **3** (not reported in ref. 2): (<sup>1</sup>H NMR (400.1 MHz, CD<sub>2</sub>Cl<sub>2</sub>, 25 °C, TMS): δ 4.2–1.1 (bm, 10 H, B-Hs), 3.72 (s, 4 H, CH<sub>2</sub>-Br); <sup>13</sup>C{<sup>1</sup>H} NMR (100.6 MHz, CD<sub>2</sub>Cl<sub>2</sub>, 25 °C, TMS): δ 73.7 (cage C), 32.4 (CH<sub>2</sub>-Br); <sup>11</sup>B{<sup>1</sup>H} (128.53 MHz, CD<sub>2</sub>Cl<sub>2</sub>, 25 °C, BF<sub>3</sub>-ether): δ -6.2 (s, 2B), -10.9 (s, 6B), -13.3 (s, 2B).)

Compounds **4**: 0.64 g (2.05 mmols) of diphenyldiselenide was dissolved in 15 mL of anhydrous EtOH in a 50 mL Schlenk flask equipped with magnetic stir bar at room temperature. Approximately 175mg of NaBH<sub>4</sub> was added slowly to a reaction mixture kept under stream of nitrogen. After 5 minutes reduction of diselenide was complete (disappearance of yellow color). 660 mg (2 mmols) of **3** was dissolved in 5 mL of anhydrous EtOH, degassed, and subsequently added to the flask with selenide via syringe. The reaction mixture was refluxed for 18 hours, the solvent was evaporated *in vacuo*, and the residual oily substance was extracted with dichloromethane and brine. The organic

layer was dried with MgSO<sub>4</sub> and chromatographed on a silica column with petroleum ether/benzene (8/2) mixture to yield analytically pure **4** (0.7 g, 72%) as an off-white solid. <sup>1</sup>H NMR (400.1 MHz, CD<sub>2</sub>Cl<sub>2</sub>, 25 °C, TMS): δ 7.51 (m, 4H), δ 7.29 (m, 6H) δ 4.2–1.1 (bm, 10 H, B-Hs), 3.44 (s, 4 H, CH<sub>2</sub>–Se); <sup>13</sup>C{<sup>1</sup>H} NMR (100.6 MHz, CD<sub>2</sub>Cl<sub>2</sub>, 25 °C, TMS): δ 133.5 (aromatic CH), 130.6 (aromatic CSe), 129.9 (aromatic CH), 128.3 (aromatic CH), δ 75.9 (cage C), 33.5 (CH<sub>2</sub>–Se); <sup>11</sup>B{<sup>1</sup>H} (128.53 MHz, CD<sub>2</sub>Cl<sub>2</sub>, 25 °C, BF<sub>3</sub>-ether): δ -6.7 (s, 2B), -10.9 (s, 6B), -13.2 (s, 2B); <sup>77</sup>Se NMR (76.34 MHz, CD<sub>2</sub>Cl<sub>2</sub>, 25 °C, Me<sub>2</sub>Se): δ 354.1 (s). Anal. Calcd for C<sub>16</sub>H<sub>24</sub>B<sub>10</sub>Se<sub>2</sub>: C, 39.84; H, 5.01. Found: C, 39.93; H, 4.93.

Compound **5**: 335 mg (0.75 mmol) of Pd(CH<sub>3</sub>CN)<sub>4</sub>[BF<sub>4</sub>]<sub>2</sub> was added to 360 mg (0.75 mmols) of **4** in 3 mL of CH<sub>3</sub>CN; the mixture was refluxed under nitrogen for 24 hours. The resulting yellowish compound was cooled to room temperature and 2eq of (<sup>n</sup>Bu)<sub>4</sub>NCl in 2mL of dry CH<sub>3</sub>CN was added. After 10 mins, a precipitate was collected by filtration, washed with methanol, redissolved in dichloromethane, and filtered through a layer of celite. The organic filtrate was evaporated *in vacuo* to yield crude product. Further recrystallization from the dichloromethane/pentane mixture yielded analytically pure **5** as a tan yellow solid (355 mg, 76%). Single crystals of X-Ray quality were grown by slow evaporation from dichloromethane in a NMR tube. ESI-MS: m/z (positive mode) 1210 [2M+Cl]<sup>+</sup> and m/z (negative mode) 659 [M+Cl]<sup>-</sup>. <sup>1</sup>H NMR (400.1 MHz, CD<sub>2</sub>Cl<sub>2</sub>, 25 °C, TMS): δ 8.03 (bs, 4H), δ 7.48 (bs, 6H) δ 4.2–1.1 (bm, 9H, B-Hs), 3.9 (b, 4 H, CH<sub>2</sub>–Se); <sup>13</sup>C{<sup>1</sup>H} NMR (74.49 MHz, DMF, 25 °C, TMS): δ 134.3 (aromatic CH), 130.8 (aromatic CH), 130.3(aromatic CH), 84 (b, C-cage), 45 (b, CH<sub>2</sub>Se); <sup>11</sup>B{<sup>1</sup>H} (128.53 MHz, CD<sub>2</sub>Cl<sub>2</sub>, 25 °C, BF<sub>3</sub>-ether): δ -0.7 (s, 1B), -3 to -18 (bm, 9B). Anal. Calcd for C<sub>16</sub>H<sub>23</sub>B<sub>10</sub>ClPdSe<sub>2</sub>: C, 30.83; H, 3.72; Cl, 5.69. Found: C, 30.90; H, 3.72; Cl, 5.36.

Compound **6**: 1 g (7 mmols) of *m*-carborane **1** was dissolved in 30 mL of dry Et<sub>2</sub>O in an oven-dried Schlenk flask. 9.4 mL of MeLi (1.6M in Et<sub>2</sub>O, 15 mmoles) was added dropwise to the mixture stirring on ice under nitrogen. The lithiation proceeded overnight at room temperature and was followed by the addition of 2.5g (15 mmoles)  $\alpha$ -chlorothioanisole dissolved in 5 mL of dry Et<sub>2</sub>O to the reaction stirred on ice. Reaction was stirred at room temperature for 24 hours, then extracted with ethyl acetate and brine; the organic extract was dried with MgSO<sub>4</sub> and evaporated *in vacuo*. The crude product was chromatographed on a silica column eluted with petroleum ether to afford analytically pure **6**. (1.78g, 66%) <sup>1</sup>H NMR (400.13 MHz, CD<sub>2</sub>Cl<sub>2</sub>, 25 °C, TMS):  $\delta$  7.5-7.1 (m, 10H),  $\delta$  3.36 (s, 4H)  $\delta$  3.2–1.5 (bm, 10H, B-Hs); <sup>13</sup>C{<sup>1</sup>H} NMR (100.62 MHz, CD<sub>2</sub>Cl<sub>2</sub>, 25 °C, TMS):  $\delta$  135.8 (aromatic CH), 130.5 (aromatic CH), 129.7 (aromatic CH), 127.6 (aromatic CH), 75.8 (s, C-cage),  $\delta$  40.8 (s, CH<sub>2</sub>S); <sup>11</sup>B{<sup>1</sup>H} (128.37 MHz, CD<sub>2</sub>Cl<sub>2</sub>, 25 °C, BF<sub>3</sub>-ether):  $\delta$  -6.7 (s, 2B), -11.1 (s, 6B), -13.8 (s, 2B). Anal. Calcd for C<sub>16</sub>H<sub>24</sub>B<sub>10</sub>S<sub>2</sub>: C, 49.45; H, 6.23. Found: C, 49.65; H, 6.17.

Compound **7**: **6** was palladated in a similar fashion as ligand **4** on a 0.5 mmol scale to afford **7** in 71% yield. Single crystals of **7** were obtained in a similar fashion to **5**. ESI-MS: m/z (positive mode) 1023 [2M+Cl]<sup>+</sup> and m/z (negative mode) 564 [M+Cl]<sup>-</sup>. <sup>1</sup>H NMR (400.13 MHz, CD<sub>2</sub>Cl<sub>2</sub>, 25 °C, TMS):  $\delta$  7.86 (m, 4ArH),  $\delta$  7.45 (m, 6ArH)  $\delta$  3.84–3.65 (dd, 4H, CH<sub>2</sub>), 3.1-1.0 (bm, 9H, cage-Hs); <sup>13</sup>C{<sup>1</sup>H} NMR (100.62 MHz, CD<sub>2</sub>Cl<sub>2</sub>, 25 °C, TMS):  $\delta$  133.5 (aromatic CH), 132.0 (aromatic CH), 131.2 (aromatic CH), 130.4 (aromatic CH) 80.0 (s, C-cage),  $\delta$  54.1 (s, CH<sub>2</sub>S); <sup>11</sup>B{<sup>1</sup>H} (128.53 MHz, CD<sub>2</sub>Cl<sub>2</sub>, 25 °C, BF<sub>3</sub>-ether):  $\delta$  0.8 (s, 1B), -6.5 to -15 (bm, 9B). Anal. Calcd for C<sub>16</sub>H<sub>23</sub>B<sub>10</sub>S<sub>2</sub>PdCl: C, 36.30; H, 4.38; Cl, 6.70. Found: C, 36.28; H, 4.17; Cl, 7.07.

## 2. Crystallographic structure determination details of **5** and **7**.<sup>S3</sup>

(a) **5**:  $C_{16}H_{23}B_{10}ClPdSe_2$ ,  $M_r = 623.21$ , monoclinic, space group  $P2_1/n$ ,  $a = 12.4086(3) \text{ \AA}$ ,  $b = 11.5587(2) \text{ \AA}$ ,  $c = 16.2997(3) \text{ \AA}$ ,  $\alpha = \gamma = 90^\circ$ ,  $\beta = 109.1730(10)^\circ$ ,  $V = 2208.15 \text{ \AA}^3$ ,  $Z = 4$ ,  $\rho_{\text{calcd}} = 1.875 \text{ g/cm}^3$ ,  $F(000) = 1200$ ,  $R(\text{int}) = 0.0383$ , goodness-of-fit on  $F^2 = 1.143$ ; the R values are  $R_1 = 0.0253$  and  $wR^2 = 0.0642$  ( $I > 2\sigma(I)$ ); max/min Fourier map electron density =  $0.786/-0.596 \text{ e \AA}^{-3}$ .

(b) **7**:  $C_{16}H_{23}B_{10}ClPdS_2$ ,  $M_r = 623.21$ , orthorhombic, space group  $Pbca$ ,  $a = 10.4063(4) \text{ \AA}$ ,  $b = 15.4367(5) \text{ \AA}$ ,  $c = 27.9230(10) \text{ \AA}$ ,  $\alpha = \beta = \gamma = 90^\circ$ ,  $V = 4485.5 (3) \text{ \AA}^3$ ,  $Z = 8$ ,  $\rho_{\text{calcd}} = 1.568 \text{ g/cm}^3$ ,  $F(000) = 2112$ ,  $R(\text{int}) = 0.1009$ , goodness-of-fit on  $F^2 = 1.239$ ; the R values are  $R_1 = 0.0495$  and  $wR^2 = 0.1073$  ( $I > 2\sigma(I)$ ); max/min Fourier map electron density =  $1.167/-3.066 \text{ e \AA}^{-3}$ .

## 3. Computational details.

DFT calculations on **5** were performed using the B3LYP and BP86 functionals with various basis sets. The presence of heavy atoms necessitated the use of effective core potentials (ECPs); calculations without ECPs were inconsistent. Table SI-1 shows the calculated HOMO-LUMO gap and Mulliken partial charges of the Pd, the boron bonded to the Pd, and the boron on the opposite side of the cage. As can be seen, the HOMO-LUMO energy gaps appear to be well-converged; however, we note the pernicious theoretical concern about the physical interpretation of such HOMO-LUMO gaps in DFT calculations. Firstly, DFT is a ground-state formulation, and, secondly, such a gap between non-interacting particles in DFT may not correspond to the physical gap. Additionally, the Mulliken partial charges on the various atoms are wildly variable. In all calculations, we see that the palladium is negatively charged, and the boron bonded to the palladium is relatively positively charged (compared to the other borons in the cage). The magnitudes of these Mulliken partial charges are not converged. Upgrading to Löwdin partial charges maintains these trends, improving consistency with respect to choice of basis set and ECP. Table SI-2 shows the

Löwdin partial charges for the same atoms under two basis set/ECP combinations. We thus recommend caution in the choice of functional and ECP and in the (quantitative) interpretation of the results.

| Functional | ECP     | HOMO-LUMO Gap (eV) | Pd Charge (au) | B(Pd) Charge (au) | B(cage) Charge (au) |
|------------|---------|--------------------|----------------|-------------------|---------------------|
| B3LYP      | CRENBL  | 4.16               | -0.46          | 1.21              | 0.05                |
| B3LYP      | LANL2DZ | 4.14               | -0.49          | 0.59              | -0.27               |
| B3LYP      | SBKJC   | 4.16               | -0.26          | 0.57              | -0.44               |
| BP86       | CRENBL  | 4.19               | -0.40          | 1.20              | 0.06                |
| BP86       | LANL2DZ | 4.14               | -0.36          | 0.26              | 0.06                |
| BP86       | SBKJC   | 4.19               | -0.55          | 0.93              | -0.24               |

**Table SI-1.**

| Functional | ECP     | Pd Charge (au) | B(Pd) Charge (au) | B(cage) Charge (au) |
|------------|---------|----------------|-------------------|---------------------|
| B3LYP      | LANL2DZ | -1.11          | -0.04             | -0.15               |
| B3LYP      | SBKJC   | -1.20          | 0.08              | -0.13               |

**Table SI-2.**

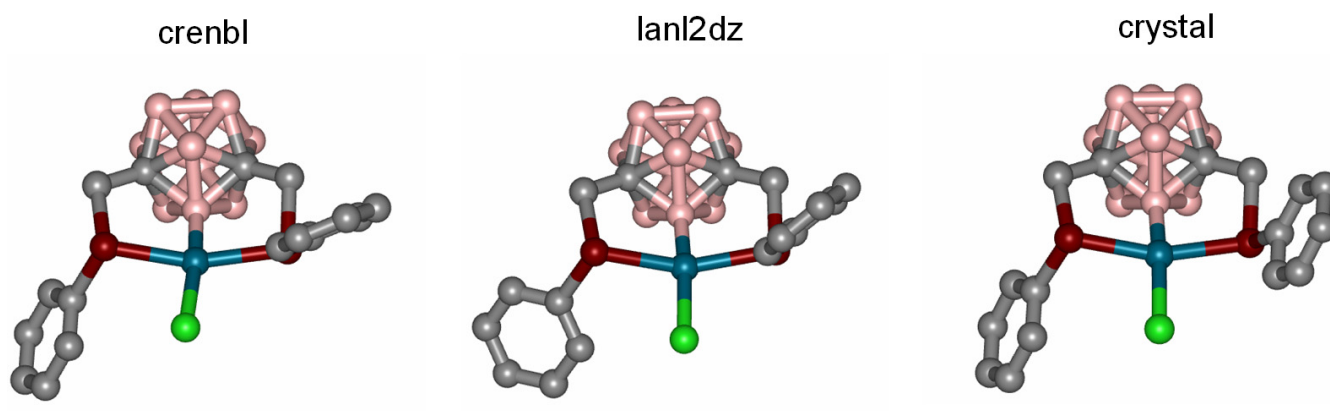

**Figure SI-1.** Visual comparison between different geometry optimizations of **5**.

|    | <b>Crenbl ( Cartesian xyz [Å])</b> |          |          | <b>Lan12dz ( Cartesian xyz [Å])</b> |          |          | <b>Crystal ( Cartesian xyz [Å])</b> |        |         |
|----|------------------------------------|----------|----------|-------------------------------------|----------|----------|-------------------------------------|--------|---------|
| Pd | 0.096245                           | -0.6778  | -0.26307 | 0.155272                            | -0.74727 | -0.42394 | 0.1735                              | 0.096  | 1.0315  |
| Se | -1.86521                           | -0.8875  | 1.244459 | -1.72827                            | -0.9598  | 1.242085 | -2.1415                             | 0.064  | 0.3085  |
| Se | 2.237797                           | 0.073928 | -1.31861 | 2.359329                            | -0.00467 | -1.44628 | 2.5545                              | 0.582  | 1.1555  |
| Cl | 0.372681                           | -3.14617 | -0.19375 | 0.406368                            | -3.23463 | -0.59839 | -0.3345                             | -0.173 | 3.4005  |
| C  | -2.2983                            | 1.053803 | 1.652662 | -2.15997                            | 1.013772 | 1.602665 | -2.0345                             | 0.335  | -1.6455 |
| C  | -1.44752                           | 2.024577 | 0.847964 | -1.34136                            | 1.957076 | 0.748164 | -0.6055                             | 0.251  | -2.1395 |
| C  | 0.932367                           | 2.51286  | -0.27449 | 0.9883                              | 2.450394 | -0.47679 | 1.9325                              | 0.766  | -1.6185 |
| C  | 2.328255                           | 1.969958 | -0.54078 | 2.381753                            | 1.950189 | -0.79231 | 2.8765                              | 1.376  | -0.6215 |
| C  | -3.40264                           | -1.47404 | 0.141519 | -3.35196                            | -1.46655 | 0.214458 | -2.7335                             | -1.767 | 0.4945  |
| C  | -4.44854                           | -0.64044 | -0.27409 | -4.61776                            | -1.10183 | 0.68718  | -2.8535                             | -2.684 | -0.5395 |
| C  | -5.50894                           | -1.17981 | -1.02407 | -5.75653                            | -1.51155 | -0.01679 | -3.2435                             | -3.981 | -0.2445 |
| C  | -5.51631                           | -2.54064 | -1.3628  | -5.62544                            | -2.29713 | -1.16766 | -3.5455                             | -4.352 | 1.0515  |
| C  | -4.45491                           | -3.36513 | -0.9542  | -4.3544                             | -2.68026 | -1.61094 | -3.4615                             | -3.421 | 2.0715  |
| C  | -3.39474                           | -2.83837 | -0.20092 | -3.20603                            | -2.26692 | -0.92315 | -3.0535                             | -2.129 | 1.8015  |
| C  | 3.732792                           | -0.6932  | -0.27217 | 3.724241                            | -0.70399 | -0.17688 | 2.7525                              | 2.168  | 2.2445  |
| C  | 3.530037                           | -1.7587  | 0.616497 | 3.473975                            | -1.8745  | 0.545209 | 2.4075                              | 2.033  | 3.5815  |
| C  | 4.632516                           | -2.29118 | 1.308528 | 4.460179                            | -2.35502 | 1.41802  | 2.5755                              | 3.1    | 4.4335  |
| C  | 5.91787                            | -1.76132 | 1.118934 | 5.673171                            | -1.67427 | 1.565551 | 3.0655                              | 4.301  | 3.9745  |
| C  | 6.112138                           | -0.69977 | 0.219129 | 5.915899                            | -0.51184 | 0.824005 | 3.4275                              | 4.423  | 2.6505  |
| C  | 5.020307                           | -0.1682  | -0.48563 | 4.944865                            | -0.02602 | -0.05985 | 3.2755                              | 3.356  | 1.7755  |
| B  | -0.32199                           | 1.305073 | -0.27648 | -0.25338                            | 1.237312 | -0.40274 | 0.5615                              | 0.008  | -0.9095 |
| B  | -1.7722                            | 2.188097 | -0.85107 | -1.73163                            | 2.08547  | -0.9399  | 0.1595                              | -1.279 | -2.0665 |
| B  | -2.13512                           | 3.528932 | 0.308736 | -2.06085                            | 3.443224 | 0.19791  | -0.2455                             | -0.516 | -3.6265 |
| B  | -0.88837                           | 3.499175 | 1.61073  | -0.77123                            | 3.452133 | 1.446655 | -0.0765                             | 1.241  | -3.4495 |
| B  | 0.219107                           | 2.145457 | 1.241958 | 0.335897                            | 2.108999 | 1.069743 | 0.4315                              | 1.554  | -1.7935 |
| B  | -0.19619                           | 2.521932 | -1.59608 | -0.19368                            | 2.419078 | -1.74765 | 1.8395                              | -0.929 | -1.7175 |
| B  | -1.31814                           | 3.8829   | -1.24667 | -1.31128                            | 3.767892 | -1.38692 | 1.3395                              | -1.267 | -3.3895 |
| B  | -0.76686                           | 4.696271 | 0.275019 | -0.71397                            | 4.613939 | 0.088012 | 1.2025                              | 0.293  | -4.2555 |
| B  | 0.698828                           | 3.830159 | 0.858283 | 0.773943                            | 3.782214 | 0.631639 | 1.6305                              | 1.583  | -3.0965 |
| B  | 0.432096                           | 4.071612 | -0.90706 | 0.439168                            | 3.98263  | -1.11992 | 2.4995                              | 0.035  | -3.0595 |
| H  | -3.36338                           | 1.20541  | 1.486553 | -3.22682                            | 1.136345 | 1.414761 | -2.5795                             | -0.353 | -2.1015 |
| H  | -2.10285                           | 1.143749 | 2.721549 | -1.96331                            | 1.160726 | 2.665492 | -2.4075                             | 1.223  | -1.8735 |
| H  | 2.917101                           | 1.87496  | 0.370187 | 3.027244                            | 1.953772 | 0.086041 | 2.7335                              | 2.355  | -0.5825 |
| H  | 2.862399                           | 2.570204 | -1.27607 | 2.840033                            | 2.530184 | -1.59362 | 3.8115                              | 1.21   | -0.8995 |
| H  | -4.4606                            | 0.41672  | -0.0406  | -4.73072                            | -0.52045 | 1.596707 | -2.6725                             | -2.428 | -1.4355 |
| H  | -6.31763                           | -0.52984 | -1.34389 | -6.73973                            | -1.22464 | 0.341654 | -3.3035                             | -4.623 | -0.9425 |
| H  | -6.337                             | -2.9527  | -1.94114 | -6.50945                            | -2.61623 | -1.70943 | -3.8115                             | -5.245 | 1.2405  |
| H  | -4.44425                           | -4.41726 | -1.22007 | -4.24797                            | -3.30066 | -2.49445 | -3.6845                             | -3.67  | 2.9605  |
| H  | -2.56576                           | -3.47445 | 0.093804 | -2.22037                            | -2.581   | -1.25204 | -2.9925                             | -1.49  | 2.5035  |
| H  | 2.543903                           | -2.19428 | 0.741033 | 2.53594                             | -2.40866 | 0.423647 | 2.0565                              | 1.211  | 3.9055  |
| H  | 4.477076                           | -3.12201 | 1.989579 | 4.268788                            | -3.26216 | 1.981497 | 2.3505                              | 3.006  | 5.3515  |
| H  | 6.763166                           | -2.1766  | 1.658652 | 6.428592                            | -2.04855 | 2.248625 | 3.1525                              | 5.039  | 4.5665  |
| H  | 7.10577                            | -0.29425 | 0.05576  | 6.860767                            | 0.012747 | 0.92263  | 3.7835                              | 5.245  | 2.3335  |
| H  | 5.179466                           | 0.633227 | -1.20104 | 5.149782                            | 0.863531 | -0.6473  | 3.5295                              | 3.442  | 0.8635  |
| H  | -2.65373                           | 1.574064 | -1.33531 | -2.62726                            | 1.453774 | -1.37618 | -0.3365                             | -2.223 | -1.7265 |
| H  | -3.25992                           | 3.758394 | 0.585664 | -3.17632                            | 3.671966 | 0.510294 | -1.0145                             | -0.955 | -4.3125 |
| H  | -1.17867                           | 3.696289 | 2.737907 | -1.01994                            | 3.680945 | 2.577507 | -0.7275                             | 1.96   | -4.0095 |
| H  | 0.739667                           | 1.480931 | 2.063667 | 0.898332                            | 1.474398 | 1.886915 | 0.1285                              | 2.491  | -1.2615 |
| H  | 0.162467                           | 2.167355 | -2.66544 | 0.12085                             | 2.044817 | -2.82367 | 2.4855                              | -1.634 | -1.1345 |
| H  | -1.85473                           | 4.46597  | -2.12476 | -1.888                              | 4.328143 | -2.25402 | 1.6385                              | -2.207 | -3.9215 |
| H  | -0.91759                           | 5.852044 | 0.46965  | -0.87094                            | 5.7722   | 0.262283 | 1.4075                              | 0.385  | -5.3515 |
| H  | 1.641206                           | 4.287666 | 1.403539 | 1.727126                            | 4.270268 | 1.129556 | 2.1325                              | 2.531  | -3.4175 |
| H  | 1.215022                           | 4.699736 | -1.52976 | 1.186945                            | 4.608276 | -1.78611 | 3.5755                              | -0.035 | -3.3595 |

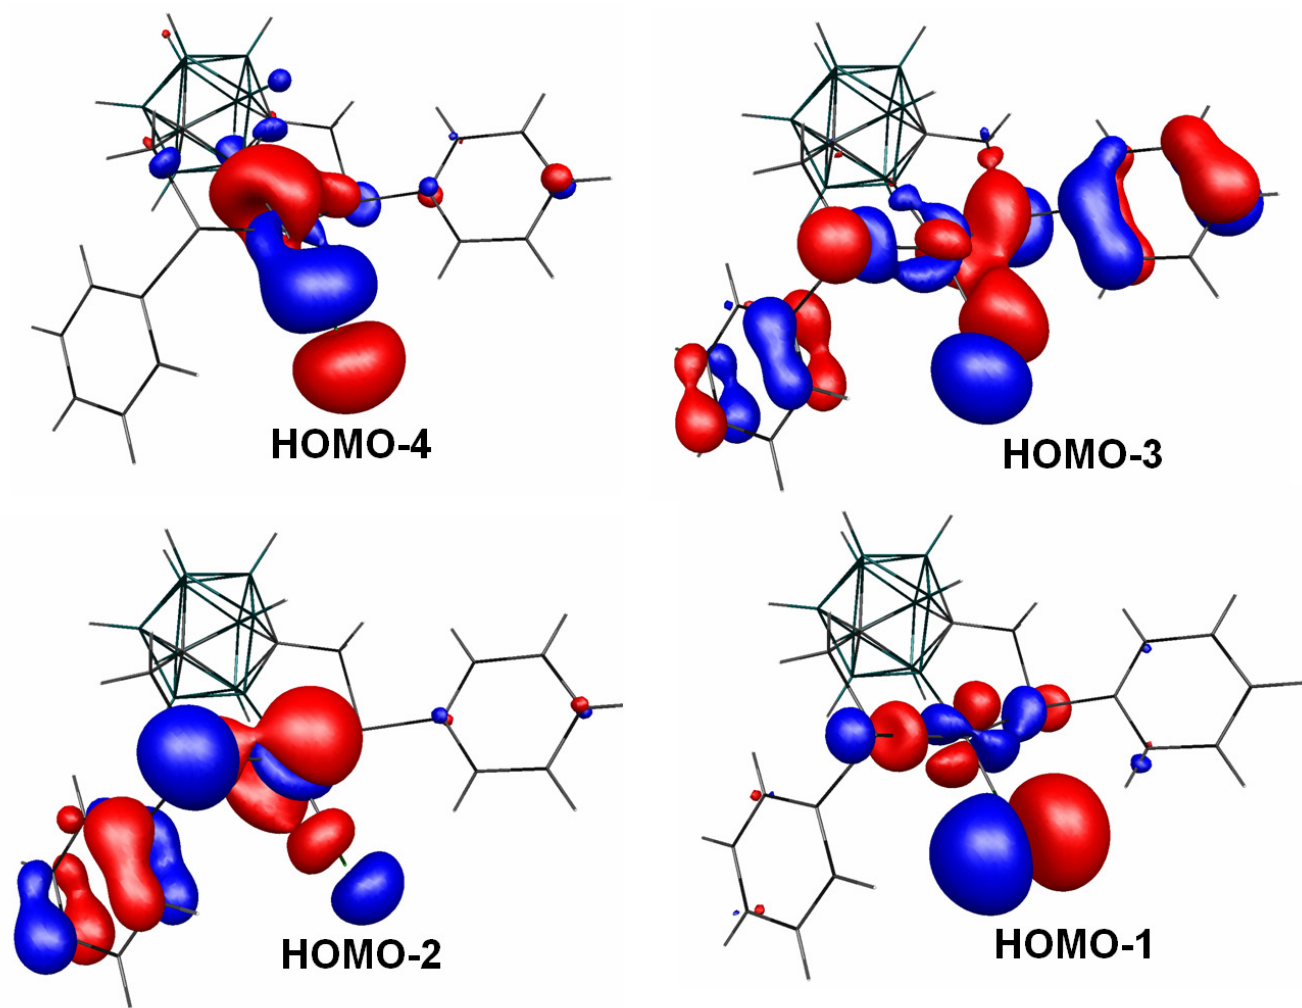

**Figure SI-2.** Calculated bonding orbitals of **5**, based on a B3LYP/LANL2DZ DFT calculation.

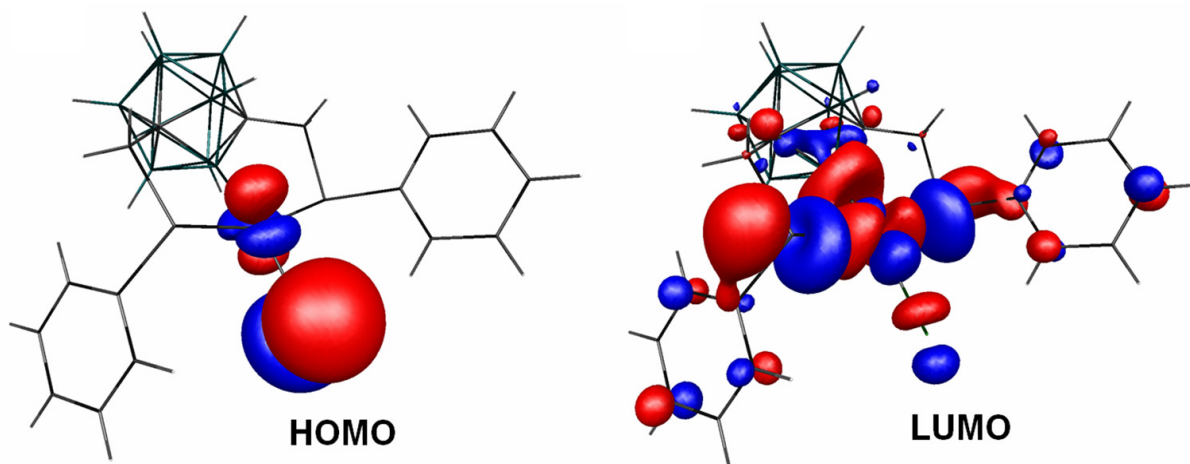

**Figure SI-3.** Molecular orbital plots of the **5** HOMO and LUMO, based on a B3LYP/LANL2DZ DFT calculation.



pincer\_se\_ligand

354.10

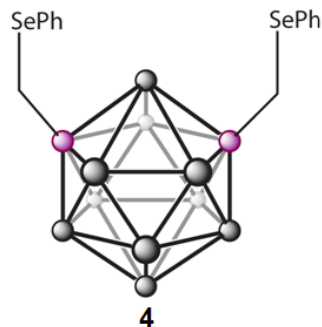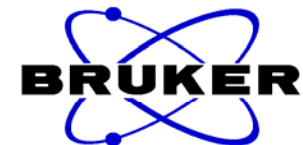

```
NAME          Se77
EXPNO         6
PROCNO        1
Date_         20090125
Time          17.46
INSTRUM       spect
PROBHD        5 mm PABBO BB-
PULPROG       zgig
TD            65536
SOLVENT       CD2Cl2
NS            44
DS            0
SWH           100000.000 Hz
FIDRES        1.525879 Hz
AQ            0.3277300 sec
RG            2050
DW            5.000 usec
DE            6.50 usec
TE            300.1 K
D1            2.00000000 sec
D11           0.03000000 sec
TD0           1
```

```
===== CHANNEL f1 =====
NUC1           77Se
P1             12.84 usec
PL1            -2.00 dB
PL1W           42.23917007 W
SFO1           76.3356460 MHz
```

```
===== CHANNEL f2 =====
CPDPRG2       waltz16
NUC2           1H
PCPD2         80.00 usec
PL2            -0.50 dB
PL12           14.20 dB
PL2W           14.48648834 W
PL12W          0.49086621 W
SFO2           400.1316005 MHz
SI             32768
SF             76.3109017 MHz
WDW            EM
SSB            0
LB             0.10 Hz
GB             0
PC             1.40
```

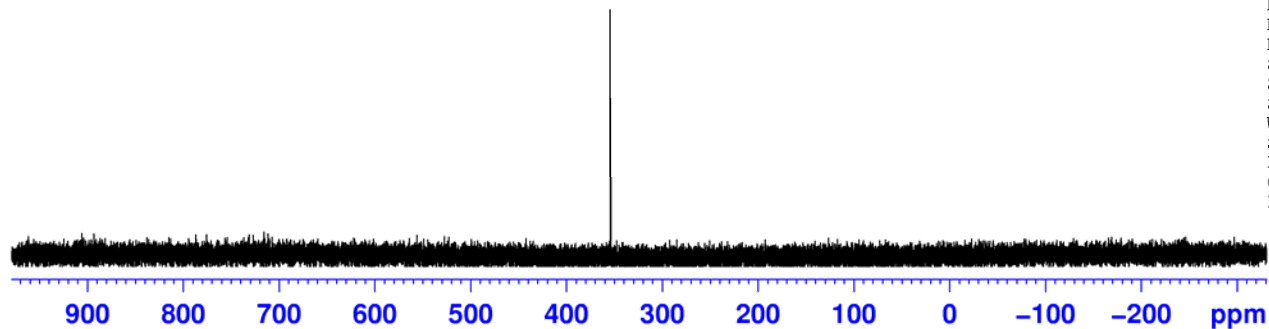

H1

7.456  
 7.448  
 7.443  
 7.439  
 7.433  
 7.256  
 7.248  
 7.240

3.364

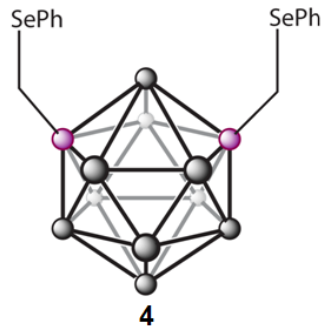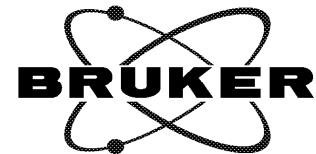

```

NAME      pincer_seph_ligand
EXPNO     1
PROCNO    1
Date_     20090213
Time      20.59
INSTRUM   spect
PROBHD    5 mm PABBO BB-
PULPROG   zq
TD        65536
SOLVENT   CD2C12
NS        4
DS        0
SWH       12019.230 Hz
FIDRES    0.183399 Hz
AQ        2.7263477 sec
RG        18
DW        41.600 usec
DE        6.50 usec
TE        298.0 K
D1        8.00000000 sec
TD0       1
  
```

```

===== CHANNEL f1 =====
NUC1      1H
P1        14.45 usec
PL1       -0.50 dB
PL1W     14.48648834 W
SFO1     400.1324710 MHz
SI        32768
SF        400.1300372 MHz
WDW       EM
SSB       0
LB        0.30 Hz
GB        0
PC        1.00
  
```

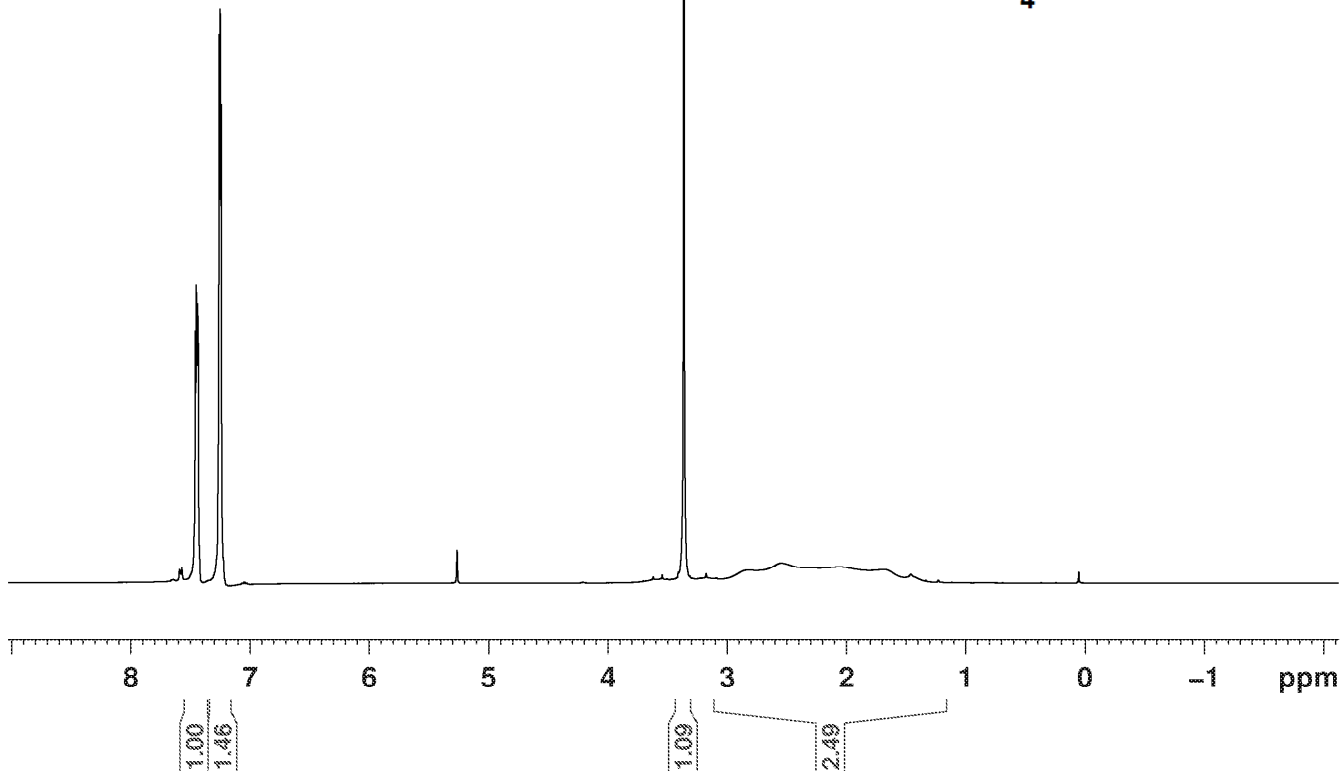

c13

133.49  
130.16  
129.91  
128.29

73.95

51.58  
51.31  
50.09  
50.77  
51.50

31.50

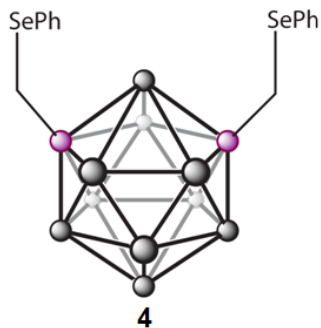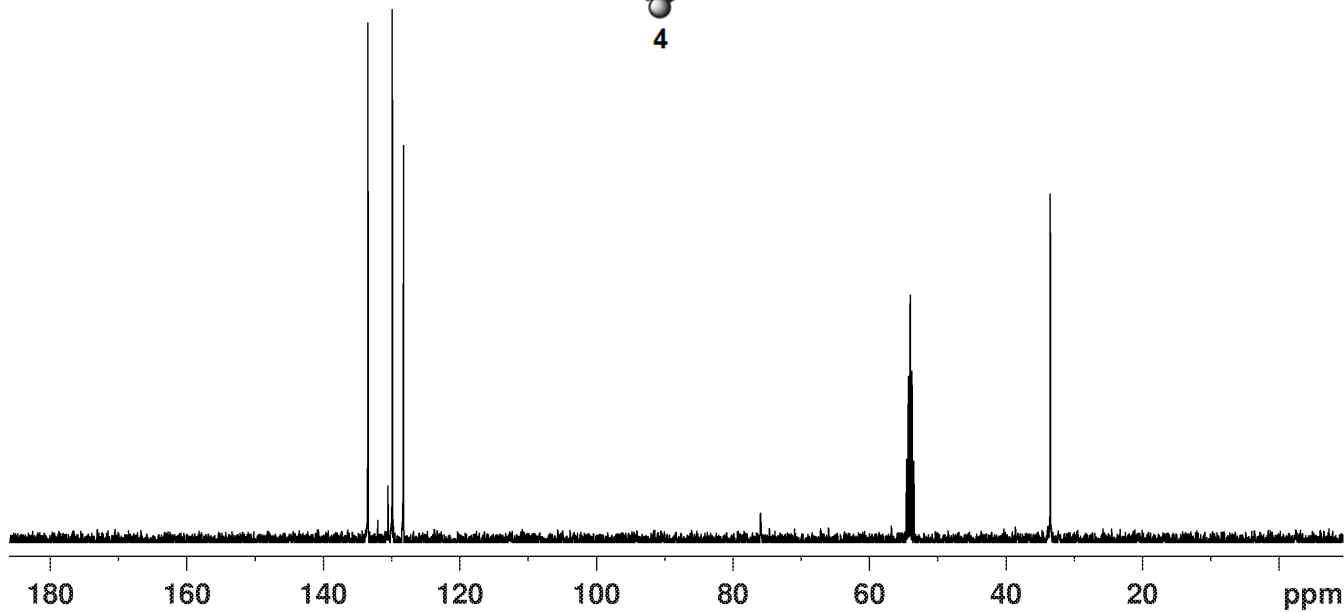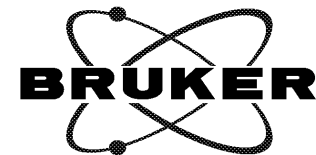

```

NAME      pincer_seph_ligand
EXPNO     2
PROCNO    1
Date_     20090213
Time      20.54
INSTRUM   spect
PROBHD    5 mm PABBO BB-
PULPROG   zgig
TD         65536
SOLVENT   CD2C12
NS         34
DS         0
SWH        24038.461 Hz
FIDRES     0.366798 Hz
AQ         1.3631988 sec
RG         228
DW         20.800 usec
DE         6.50 usec
TE         298.1 K
D1         2.00000000 sec
D11        0.03000000 sec
TD0        1
  
```

```

===== CHANNEL f1 =====
NUC1      13C
P1         9.34 usec
PL1        -2.50 dB
PL1W      68.78927612 W
SFO1      100.6228298 MHz
  
```

```

===== CHANNEL f2 =====
CPDPRG2   waltz16
NUC2      1H
PCPD2     80.00 usec
PL2        -0.50 dB
PL12       14.20 dB
PL2W      14.48648834 W
PL12W     0.49086621 W
SFO2      400.1316005 MHz
SI         32768
SF         100.6127095 MHz
WDW        EM
SSB         0
LB         2.00 Hz
GB         0
PC         1.40
  
```

$^{77}\text{Se}$

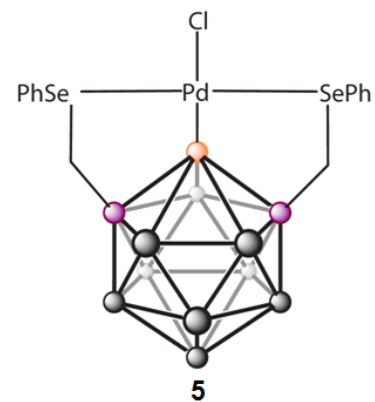

-20 °C

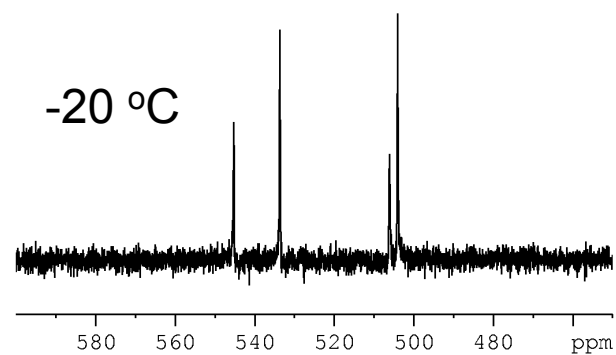

RT

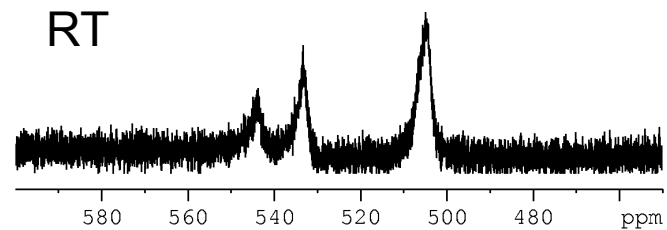

-20 °C

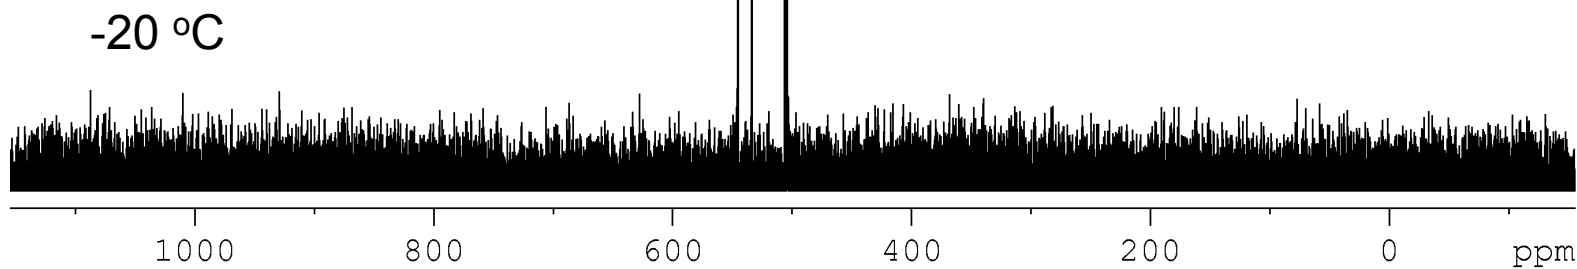

VT-<sup>1</sup>H

RT

0 °C

-5 °C

-10 °C

-20 °C

-30 °C

-45 °C

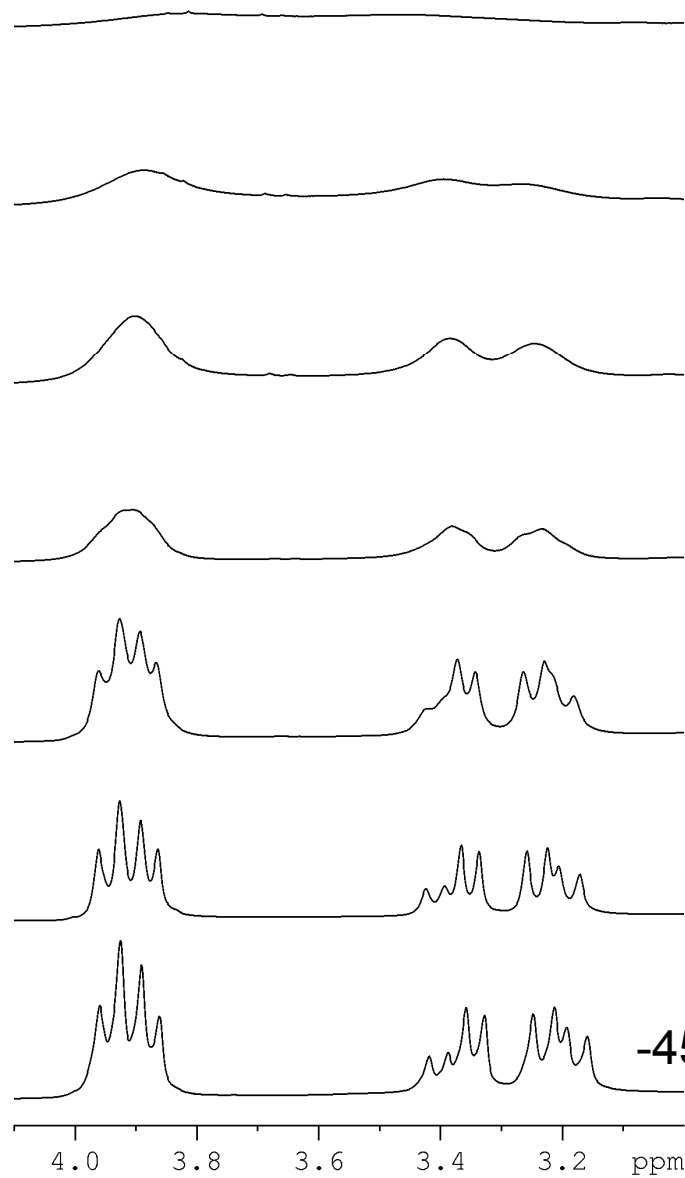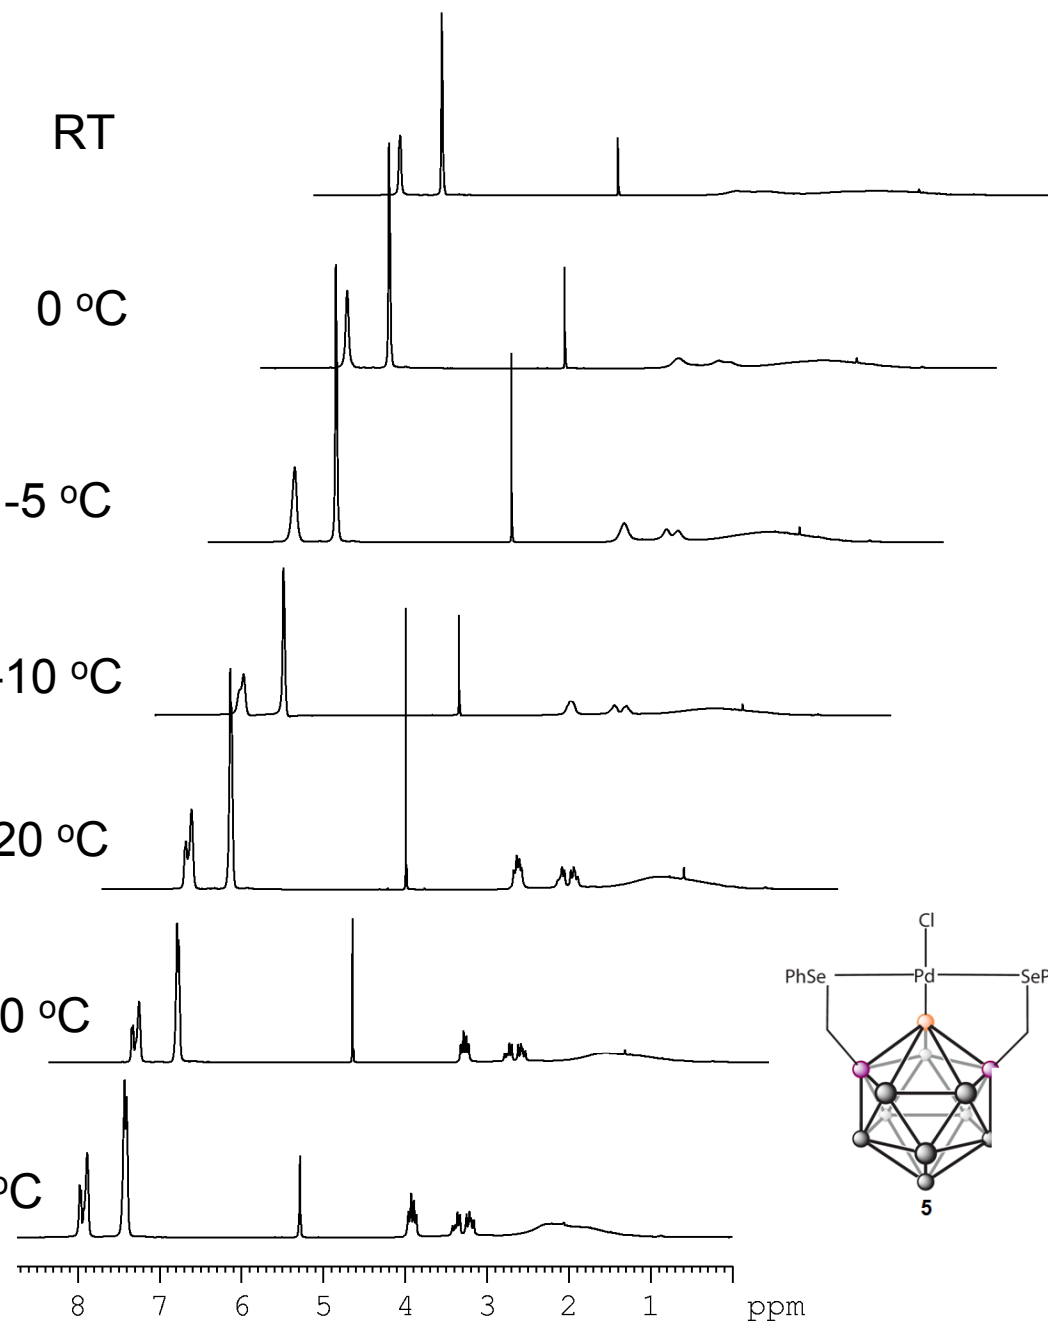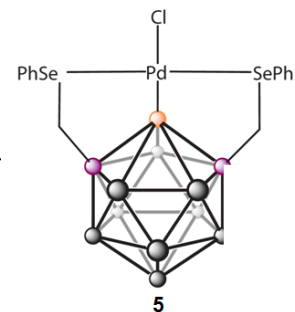

VT-<sup>13</sup>C

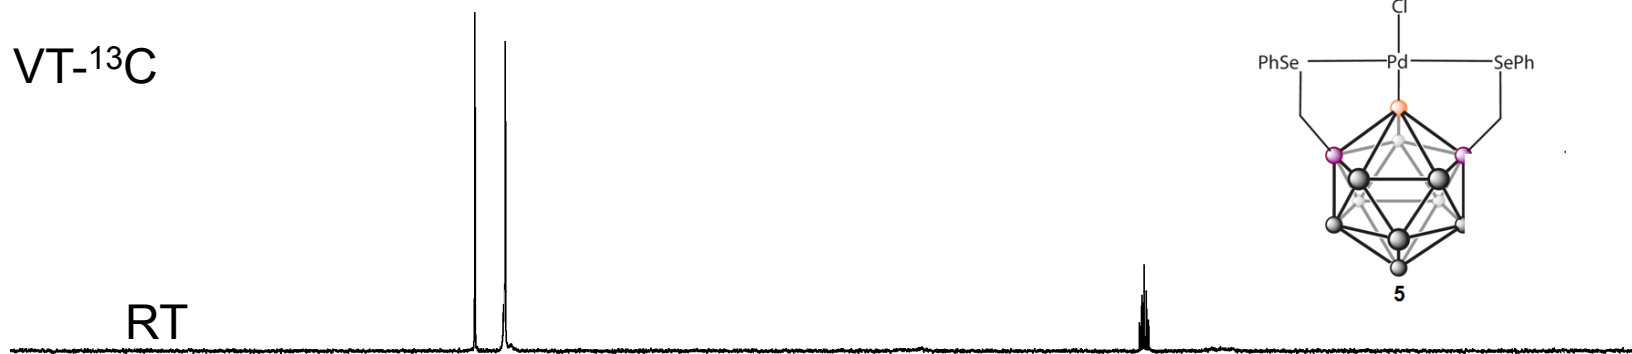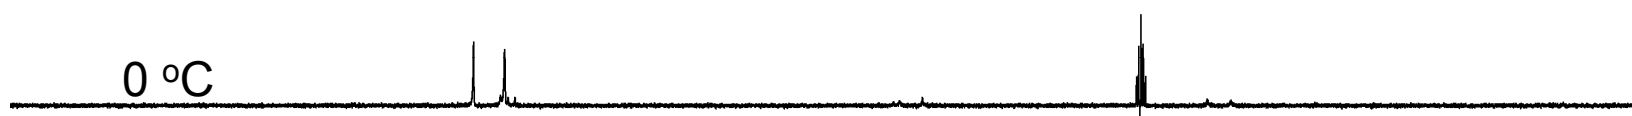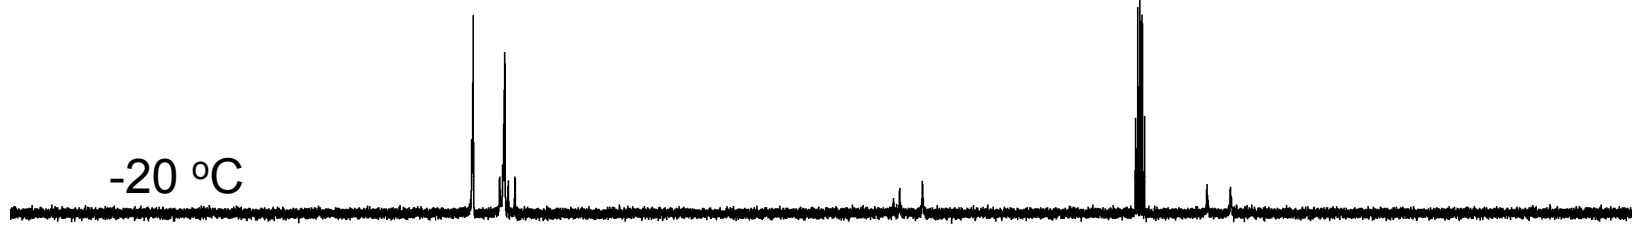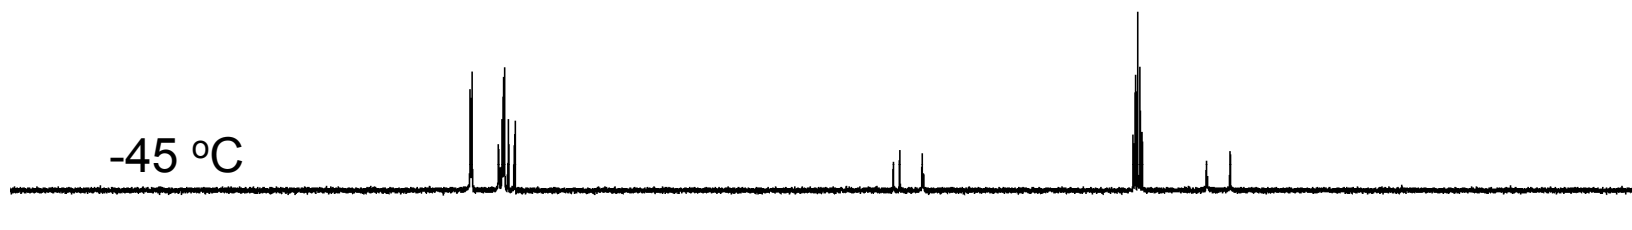

180 160 140 120 100 80 60 40 20 ppm

H1

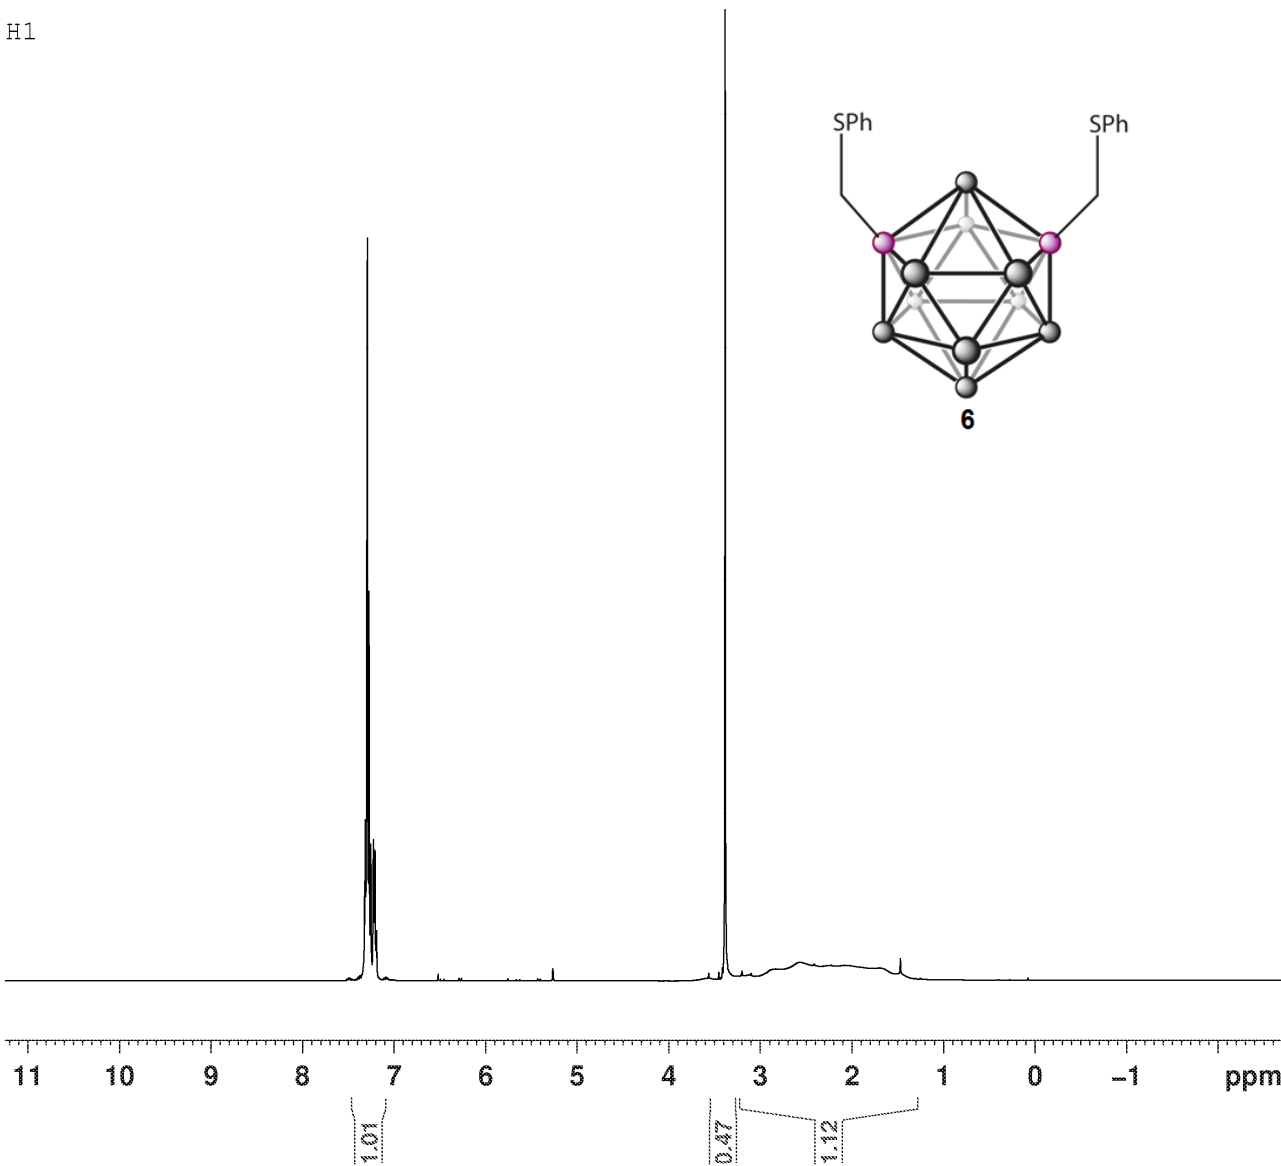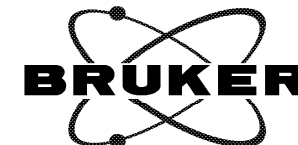

NAME pincer\_sph\_ligand  
EXPNO 1  
PROCNO 1  
Date\_ 20090211  
Time 14.36  
INSTRUM spect  
PROBHD 5 mm PABBO BB-  
PULPROG zg  
TD 65536  
SOLVENT CD2Cl2  
NS 4  
DS 0  
SWH 12019.230 Hz  
FIDRES 0.183399 Hz  
AQ 2.7263477 sec  
RG 18  
DW 41.600 usec  
DE 6.50 usec  
TE 300.2 K  
D1 8.00000000 sec  
TD0 1

==== CHANNEL f1 =====  
NUC1 1H  
P1 14.45 usec  
PL1 -0.50 dB  
PL1W 14.48648834 W  
SFO1 400.1324710 MHz  
SI 32768  
SF 400.1300372 MHz  
WDW EM  
SSB 0  
LB 0.30 Hz  
GB 0  
PC 1.00

```

NAME      pincer_sph_ligand
EXPNO     3
PROCNO    1
Date_     20090211
Time      15.08
INSTRUM   spect
PROBHD    5 mm PABBO BB-
PULPROG   zgig
TD         65536
SOLVENT   CD2Cl2
NS         10
DS         0
SWH        24038.461 Hz
FIDRES     0.366798 Hz
AQ         1.3631988 sec
RG         101
DW         20.800 usec
DE         6.50 usec
TE         300.2 K
D1         2.00000000 sec
D11        0.03000000 sec
TD0        1

```

```

===== CHANNEL f1 =====
NUC1       11B
P1         12.80 usec
PL1        1.00 dB
PL1W       17.63811874 W
SFO1       128.3776050 MHz

```

```

===== CHANNEL f2 =====
CPDPRG2    waltz16
NUC2        1H
PCPD2       80.00 usec
PL2         -0.50 dB
PL12        14.20 dB
PL2W        14.48648834 W
PL12W       0.49086621 W
SFO2        400.1316005 MHz
SI          32768
SF          128.3776331 MHz
WDW         EM
SSB         0
LB          1.00 Hz
GB          0
PC          1.40

```

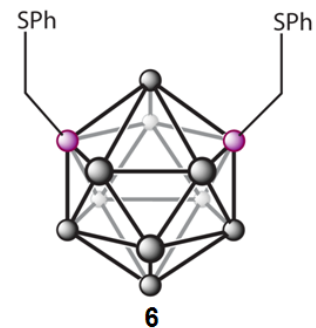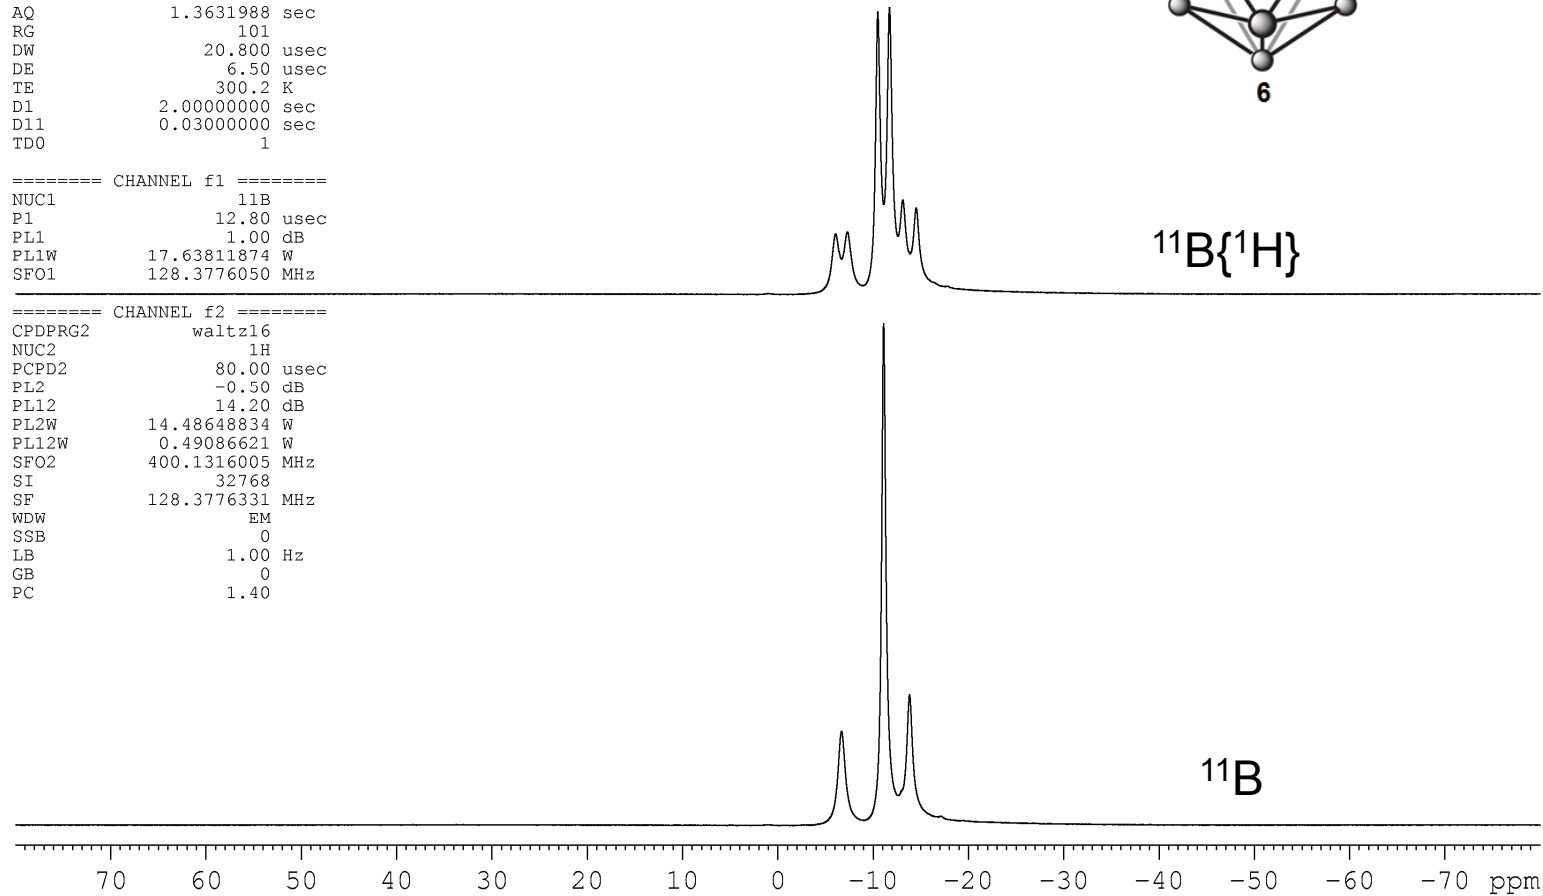



```

NAME      pincer_sph_complex
EXPNO     3
PROCNO    3
Date_     20090212
Time      11.29
INSTRUM   spect
PROBHD    5 mm PABBO BB-
PULPROG   zg
TD         65536
SOLVENT   CD2Cl2
NS         17
DS         0
SWH        24038.461 Hz
FIDRES     0.366798 Hz
AQ         1.3631988 sec
RG         101
DW         20.800 usec
DE         6.50 usec
TE         300.0 K
D1         4.00000000 sec
TD0        1

```

```

===== CHANNEL f1 =====
NUC1      11B
P1        12.80 usec
PL1       1.00 dB
PL1W      17.63811874 W
SF01      128.3776050 MHz
SI        32768
SF        128.3776331 MHz
WDW       EM
SSB       0
LB        1.00 Hz
GB        0
PC        1.40

```

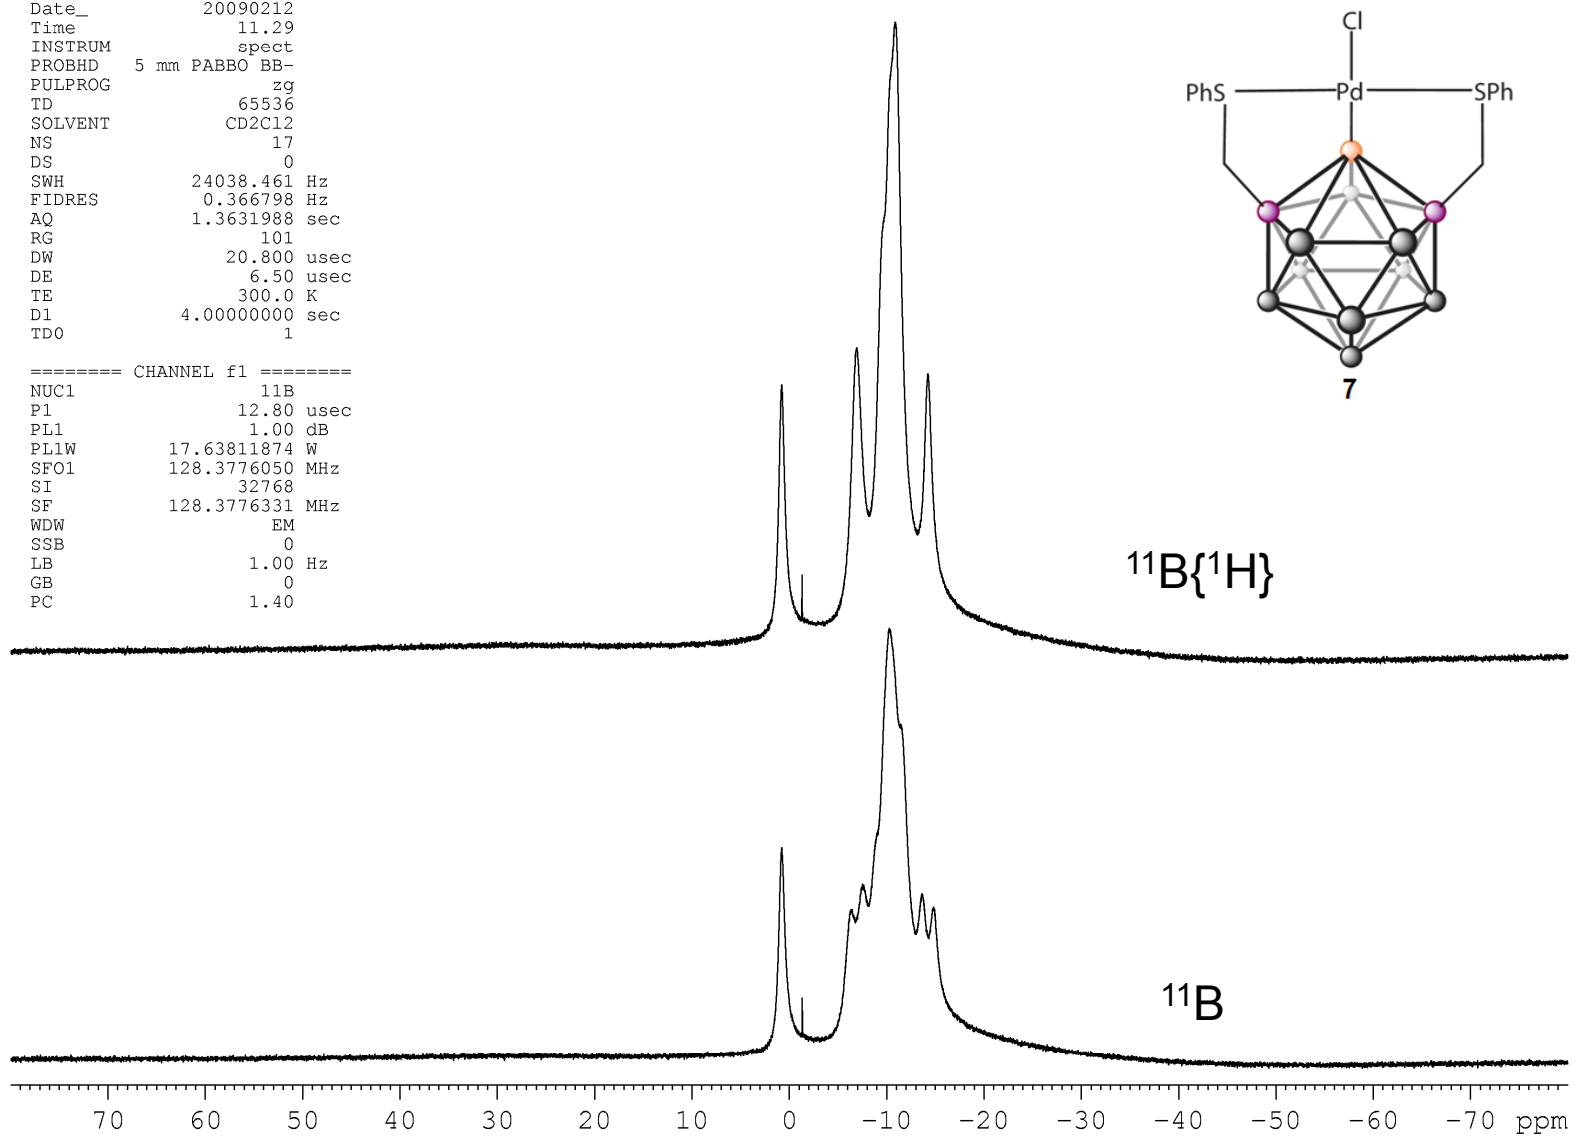

c13

..... 135.80  
 ..... 130.50  
 ..... 129.76  
 ..... 107.67

..... 75.00

..... 54.57  
 ..... 54.30  
 ..... 54.03  
 ..... 53.76  
 ..... 53.49  
 ..... 40.86

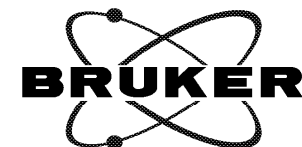

```

NAME      pincer_sph_ligand
EXPNO     2
PROCNO    1
Date_     20090211
Time      14.42
INSTRUM   spect
PROBHD    5 mm PABBO BB-
PULPROG   zgig
TD         65536
SOLVENT   CD2Cl2
NS         35
DS         0
SWH        24038.461 Hz
FIDRES     0.366798 Hz
AQ         1.3631988 sec
RG         228
DW         20.800 usec
DE         6.50 usec
TE         300.2 K
D1         2.00000000 sec
D11        0.03000000 sec
TD0        1
  
```

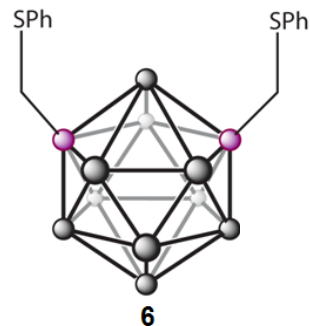

```

===== CHANNEL f1 =====
NUC1      13C
P1         9.34 usec
PL1       -2.50 dB
PL1W      68.78927612 W
SFO1      100.6228298 MHz
  
```

```

===== CHANNEL f2 =====
CPDPRG2   waltz16
NUC2       1H
PCPD2      80.00 usec
PL2        -0.50 dB
PL12       14.20 dB
PL2W       14.48648834 W
PL12W      0.49086621 W
SFO2       400.1316005 MHz
SI         32768
SF         100.6127095 MHz
WDW        EM
SSB        0
LB         2.00 Hz
GB         0
PC         1.40
  
```

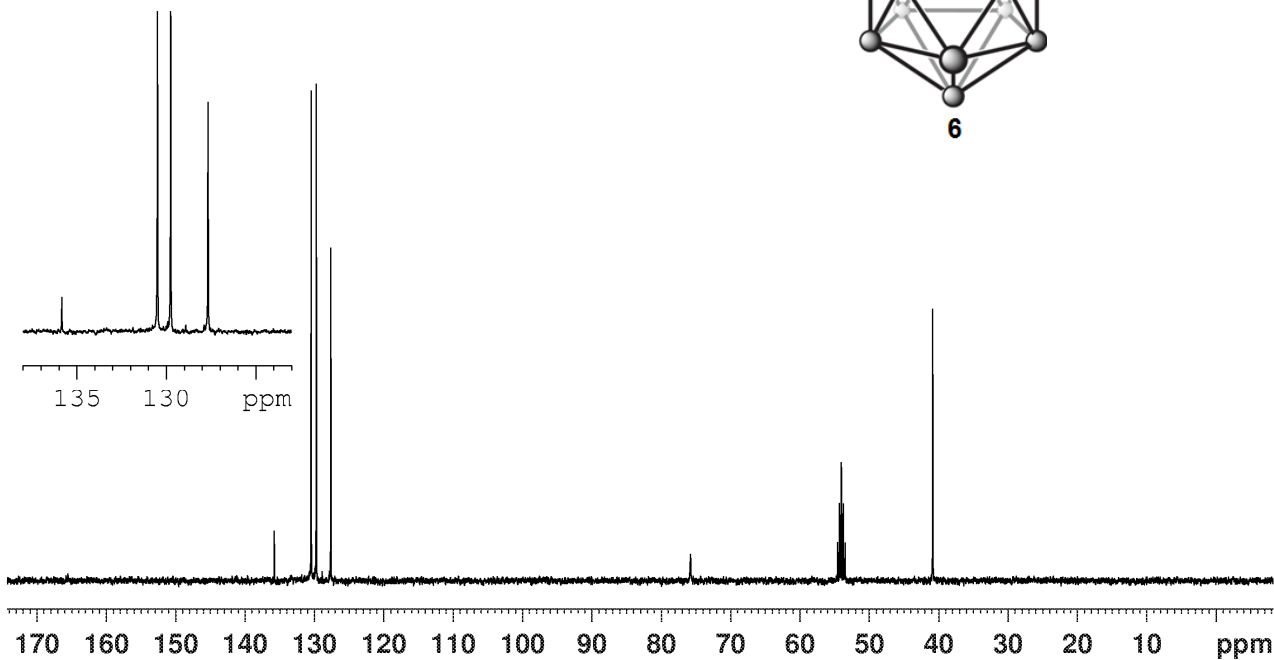

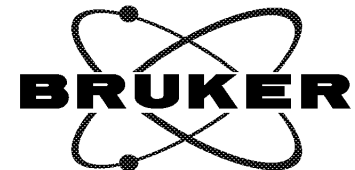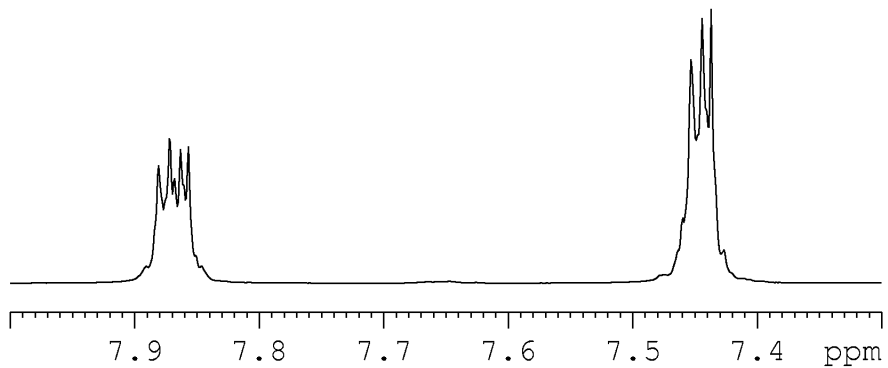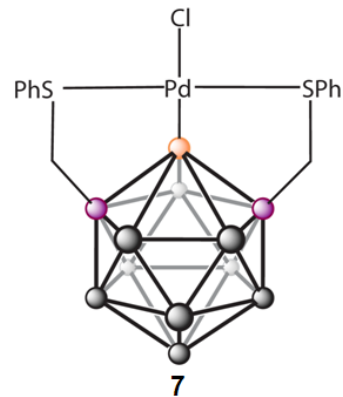

```

NAME      pincer_sph_complex
EXPNO     2
PROCNO    3
Date_     20090215
Time      18.14
INSTRUM   spect
PROBHD    5 mm PABBO BB-
PULPROG   zg
TD         65536
SOLVENT   CD2C12
NS         3
DS         0
SWH       12019.230 Hz
FIDRES    0.183399 Hz
AQ        2.7263477 sec
RG         18
DW         41.600 usec
DE         6.50 usec
TE         262.4 K
D1         8.00000000 sec
TD0        1
    
```

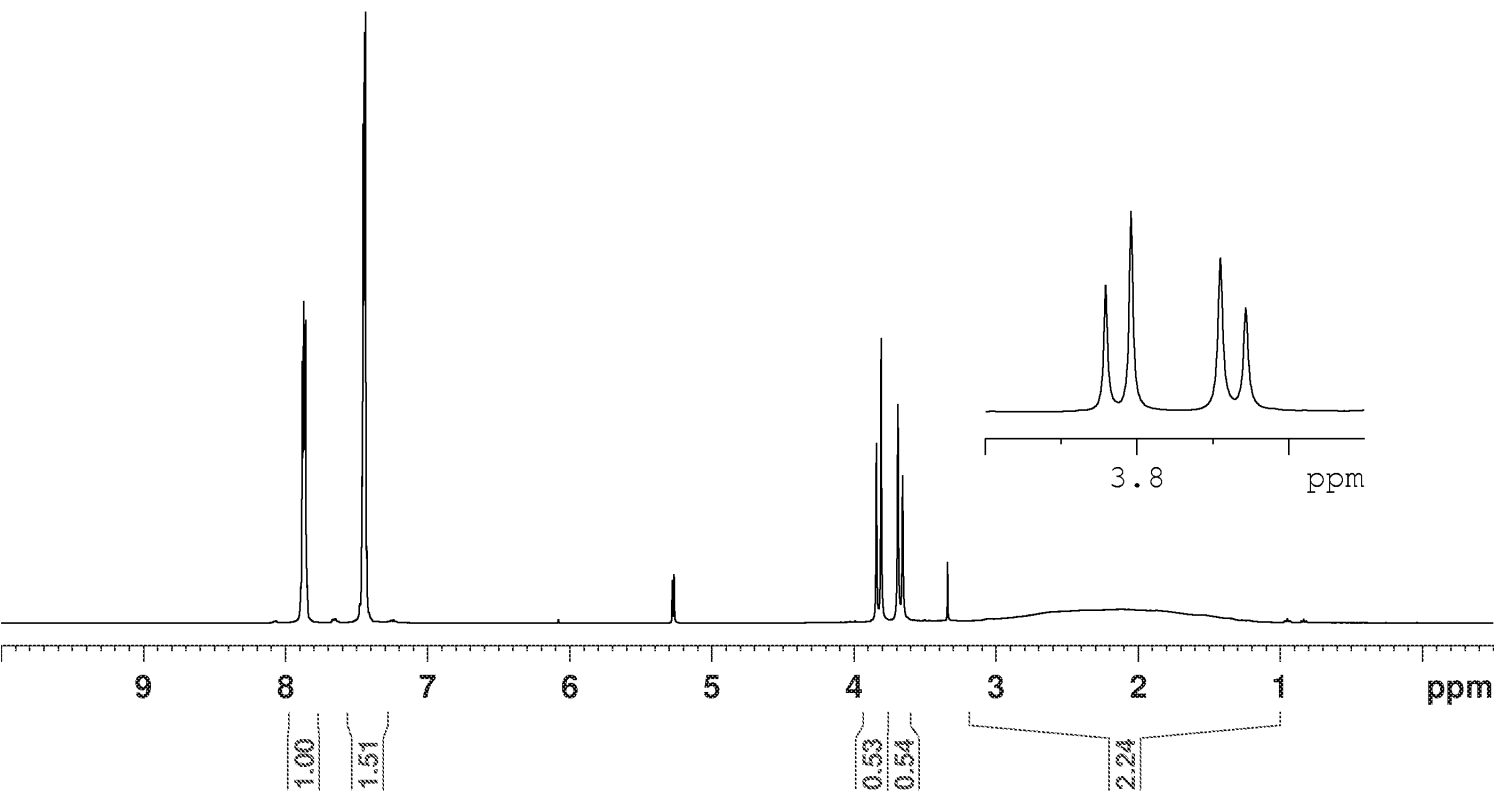

```

===== CHANNEL f1 =====
NUC1      1H
P1        14.45 usec
PL1       -0.50 dB
PL1W      14.48648834 W
SFO1      400.1324710 MHz
SI        32768
SF        400.1300372 MHz
WDW       EM
SSB       0
LB        0.30 Hz
GB        0
PC        1.00
    
```

c13

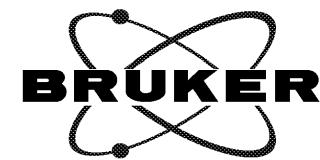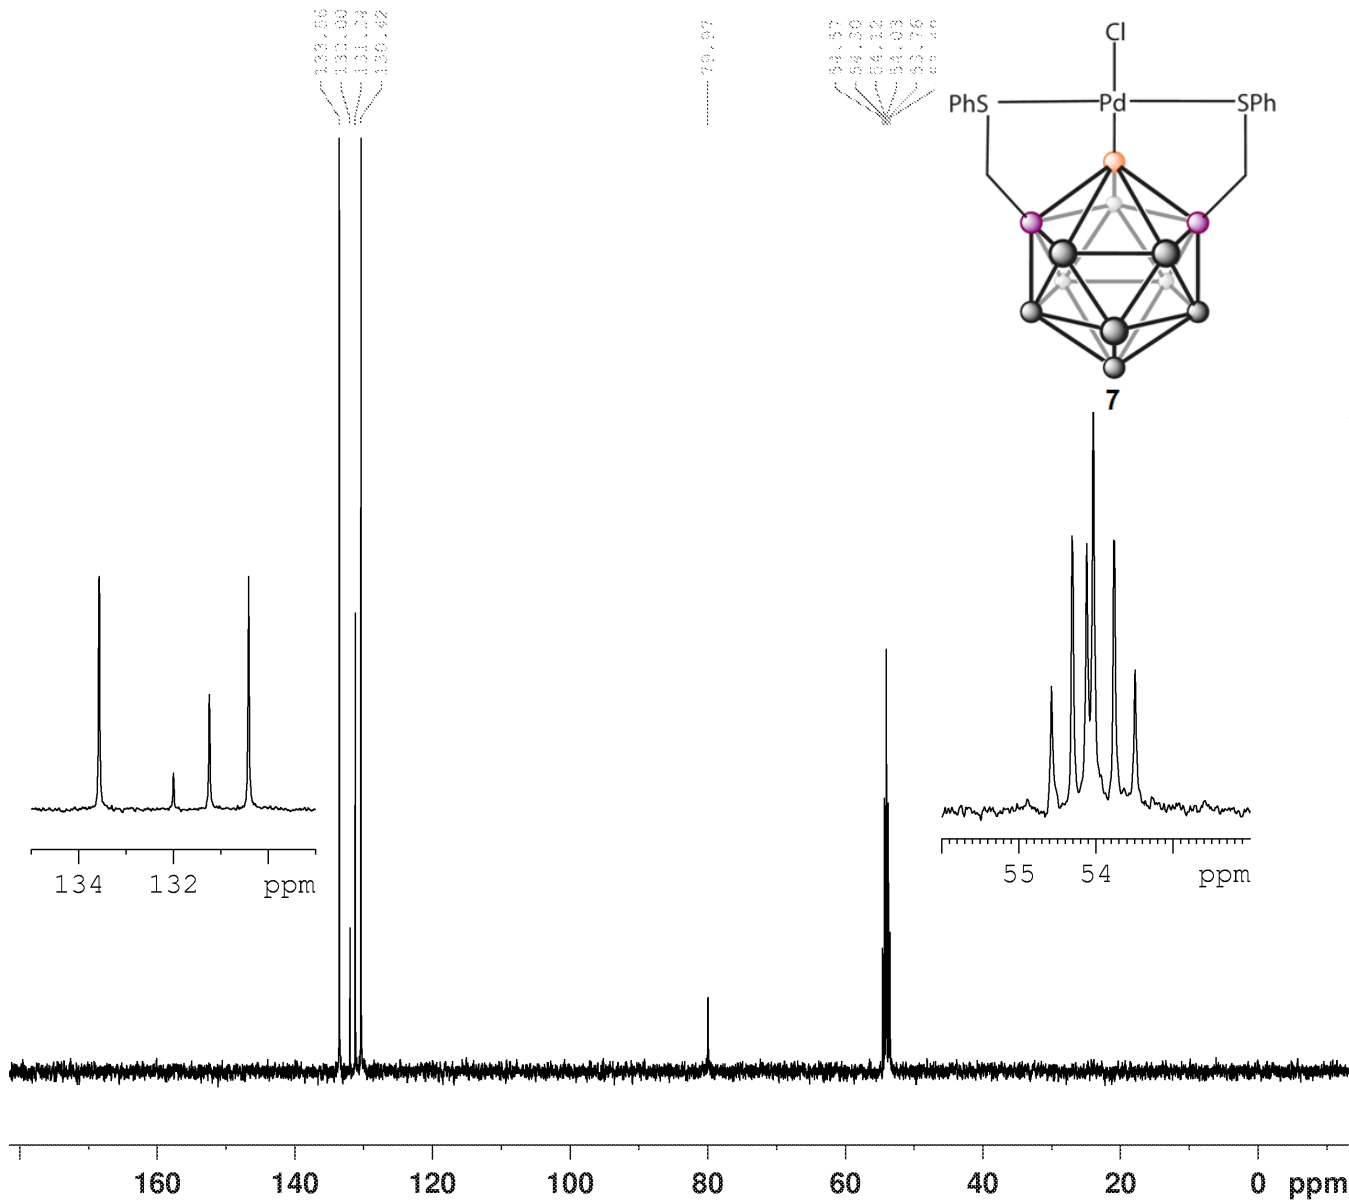

```

NAME      pincer_sph_complex
EXPNO     1
PROCNO    3
Date_     20090212
Time      11.18
INSTRUM   spect
PROBHD    5 mm PABBO BB-
PULPROG   zgig
TD         65536
SOLVENT   CD2C12
NS         146
DS         0
SWH        24038.461 Hz
FIDRES     0.366798 Hz
AQ         1.3631988 sec
RG         228
DW         20.800 usec
DE         6.50 usec
TE         300.1 K
D1         2.00000000 sec
D11        0.03000000 sec
TD0        1

```

```

===== CHANNEL f1 =====
NUC1      13C
P1         9.34 usec
PL1        -2.50 dB
PL1W      68.78927612 W
SFO1      100.6228298 MHz

```

```

===== CHANNEL f2 =====
CPDPRG2   waltz16
NUC2       1H
PCPD2      80.00 usec
PL2        -0.50 dB
PL12       14.20 dB
PL2W      14.48648834 W
PL12W     0.49086621 W
SFO2      400.1316005 MHz
SI         32768
SF         100.6127095 MHz
WDW        EM
SSB         0
LB          2.00 Hz
GB          0
PC          1.40

```

## 5. References.

- S1. Grafstein, D.; Dvorak, J. *Inorg. Chem.* **1963**, *2*, 1128-1122.
- S2. Zakharkin, L. I.; Kovredov, A. I.; Kazantsev, A. V.; Meiramov, M. G. *Zh. Obshch. Khim. (Russian Journal of General Chemistry)* **1981**, *51*, 357-361.
- S3. Sheldrick, G.M. SHELXTL Version 6.14; Bruker Analytical X-ray Instruments, Inc.: Madison, WI, 2003.
- S4. We performed a search in CCDC (ConQuest, vers. 5.29) for Pd-B bond, and obtained 61 hits. Out of these hits, only iminoboryl-Pd (Braunschweig, H.; Radacki, K.; Rais, D.; Uttinger, K. *Angew. Chem.* **2006**, *118*, 169-172) system (B-Pd – 1.958 Å) is significantly shorter.
- S5. Search in CCDC (ConQuest, vers. 5.29) has given no structures with PhSe-Pd-SePh pincer motif. A number of PhS-Pd-SPh structures, allowed for indirect comparison: Gerhardt et al. *Org. Chem.*, **2006**, *71*, 6333–6341 (Pd-Cl distance – 2.40 Å) and Van Koten et al. *Angew. Chem. Int. Ed.* **1999**, 2186-2188 (Pd-Cl distance – 2.36 Å).
